# Supplementary material for: Population variation in and selection for resistance to pyrethroid-neonicotinoid insecticides in the bed bug
Source: PubMed Central journal article supplement — Sci Rep. 2014 Jan 23;4:3836. doi: 10.1038/srep03836 (PMC3899600; doi:10.1038/srep03836), 2014-01-23

**Population variation in and selection for resistance to Pyrethroid-Neonicotinoid insecticides in the bed bug**

Jennifer R. Gordon, Mark H. Goodman, Michael F. Potter and Kenneth F. Haynes

**Supplemental Figure S1.** Susceptibility to Temprid between three strains of bugs. Groups of 10 bugs were exposed to filter papers saturated with label rate Temprid for different exposure times then removed. Mortality was scored after 24 h as the insect's inability to right itself after 15 s and converted to probit. No control mortality was observed.

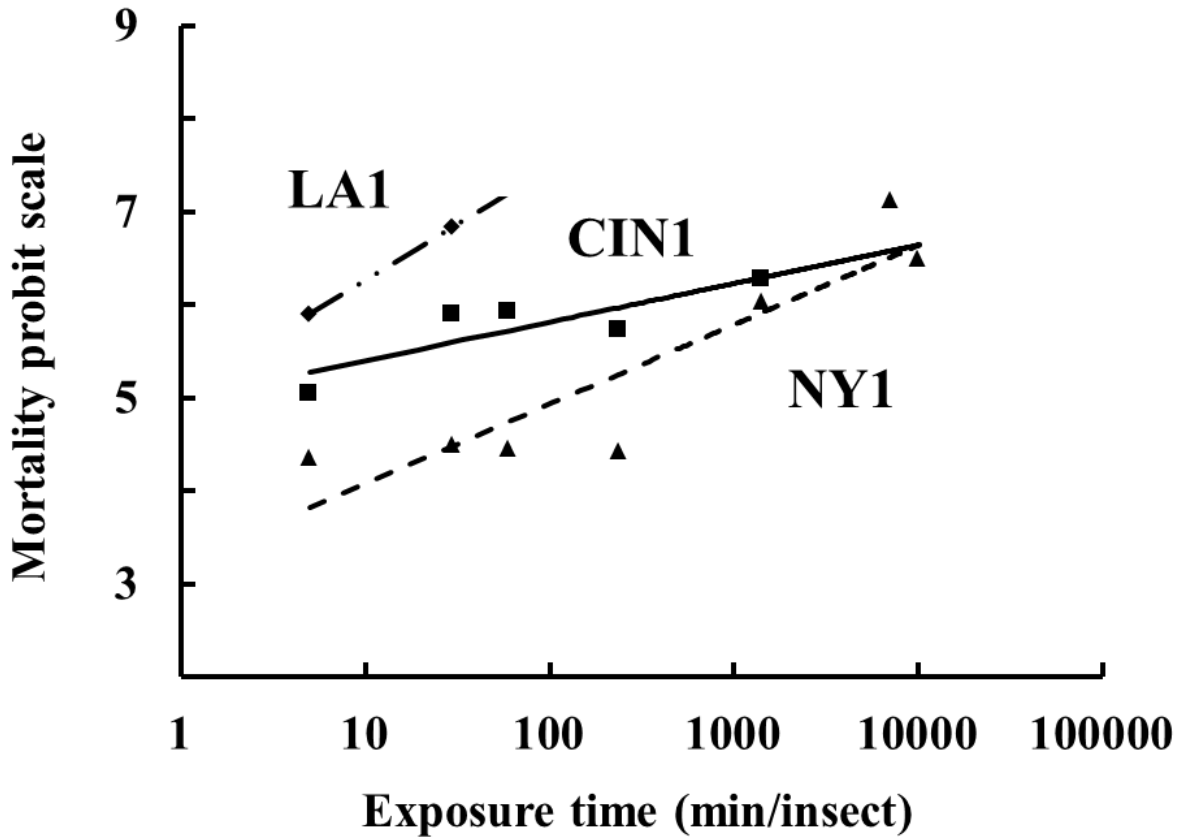

Supplement: srep03836-s1.pdf [file srep03836-s1.pdf]
